# Supplementary material for: Facile and scalable synthesis of recyclable N,Se-doped CuO microrods of microsheets for highly efficient reduction of 4-nitrophenol
Source: Royal Society of Chemistry journal article supplement (doi:10.1039/d4nj00572d), 2024-01-01
Supplement: d4nj00572d1.pdf [file d4nj00572d1.pdf]

## Supporting information

### Experimental section

Reagents and materials: All chemical reagents were purchased from commercial suppliers and used as received without further purification. Copper(II) nitrate trihydrate ( $\text{Cu}(\text{NO}_3)_2 \cdot 3\text{H}_2\text{O}$ , 99%) was purchased from Shanghai Titan Scientific Co., Ltd. Ni foam and Selenium powder (Se, 99%) was purchased from Sinopharm Chemical Reagent Co., Ltd. Commercial NF was purchased from Suzhou Cheng Er Nuo Technology Co., Ltd. 4-nitrophenol (4-NP) and 4-aminophenol (4-AP) were obtained from Shanghai Macklin Biochemical Co., Ltd. Sodium borohydride ( $\text{NaBH}_4$ , 98%) was purchased from Aladdin Industrial Cooperation. Deionized (DI) water was homemade in the lab.

### Physical characterizations:

XRD data were acquired by Bruker D8 instrument with  $\text{Cu-K}\alpha$  radiation. SEM measurements were carried out on a Hitachi S-4800 Scanning Electron microscope. TEM images were collected on a JEOL JEM 2100F electron microscopy. XPS spectra were recorded on a Kratos AXIS Ultra<sup>DL</sup> X-ray photoelectron spectrometer.  $^1\text{H}$  NMR spectra were acquired on a Bruker Avance NEO 600 MHz. Electron paramagnetic resonance (EPR) spectra were acquired on a Bruker EMXplus-6/1 spectrometer at room temperature.

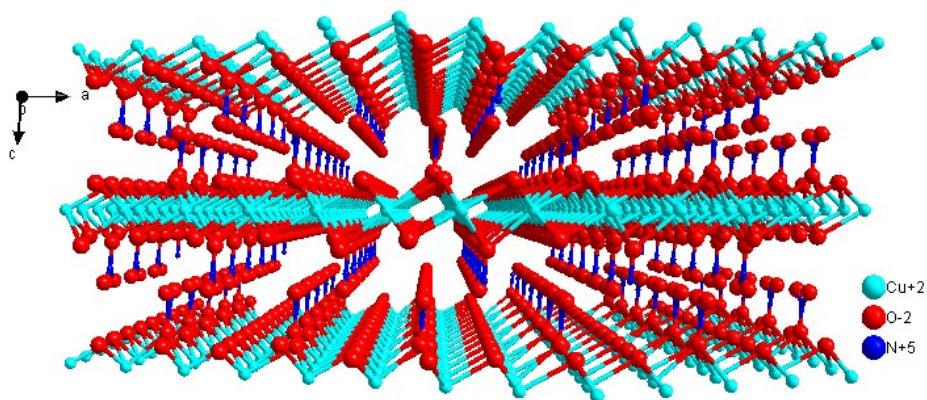

**Fig. S1** 2D structure diagram of  $\text{Cu}_2(\text{OH})_3(\text{NO}_3)$

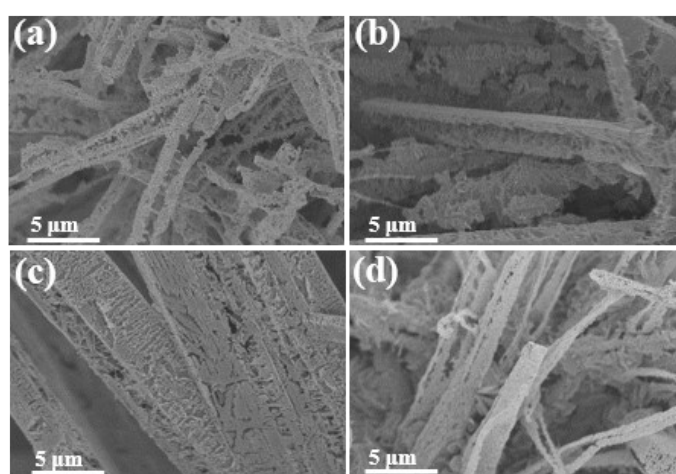

**Fig. S2** SEM of (a) N,Se-CuO(0.3-350-1), (b) N,Se-CuO(0.2-350-1), (c) N,Se-CuO(0.1-350-1) and (d) N,Se-CuO(0-350-1).

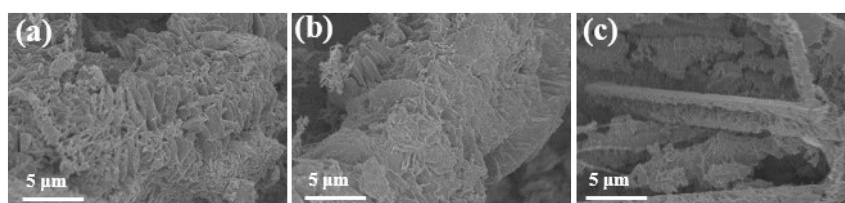

**Fig. S3** SEM of (a) N,Se-CuO(0.2-250-1), (b) N,Se-CuO(0.2-300-1) and (c) N,Se-CuO(0.2-350-1).

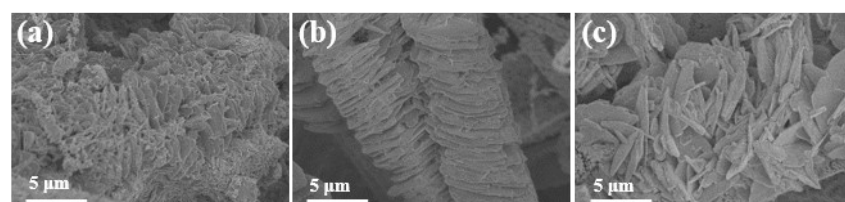

**Fig. S4** SEM of (a) N,Se-CuO(0.2-250-1), (b) N,Se-CuO(0.2-250-2) and (c) N,Se-CuO(0.2-250-3).

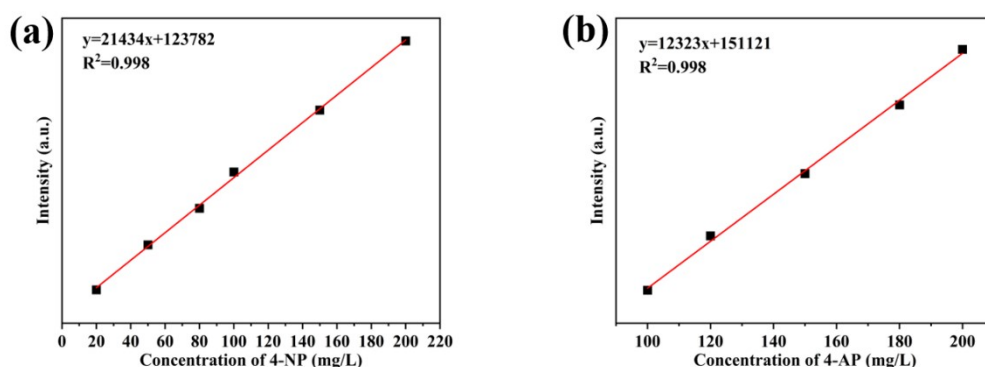

**Fig. S5** The fitted standard curves of (a) 4-NP and (b) 4-AP.

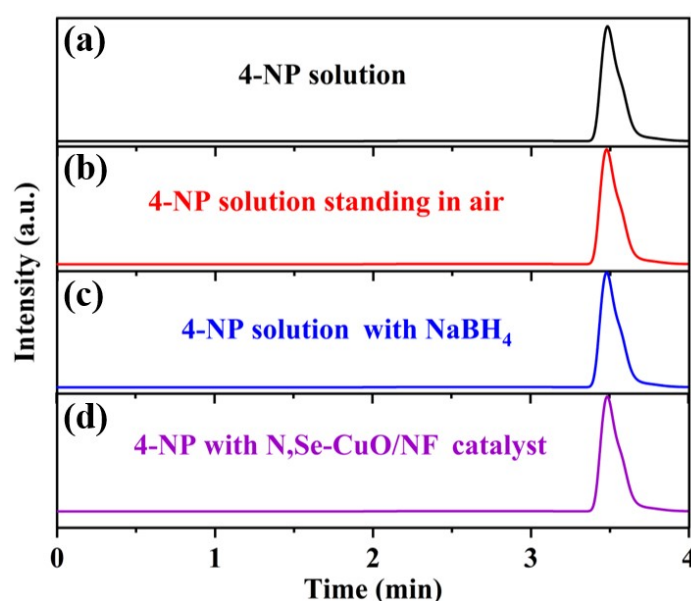

**Fig. S6** (a) Liquid chromatogram of 4-NP solution. (b) Liquid chromatogram of 4-NP solution after standing in air for 100 minutes. (c) Liquid chromatogram of 4-NP solution after adding  $\text{NaBH}_4$  for 100 minutes. (d) Liquid chromatogram of 4-NP solution after the adding N,Se-CuO/NF catalyst for 100 minutes.

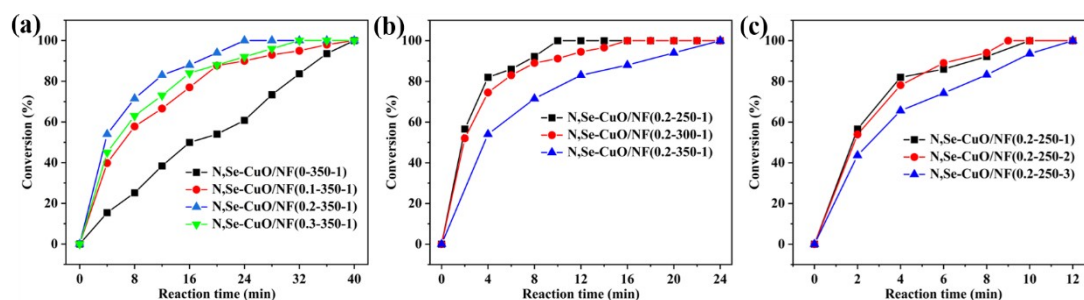

**Fig. S7** Catalytic conversion efficiency of the N,Se-CuO/NF catalysts synthesized at different (a) qualities of selenium powder, (b) temperatures and (c) calcination time.

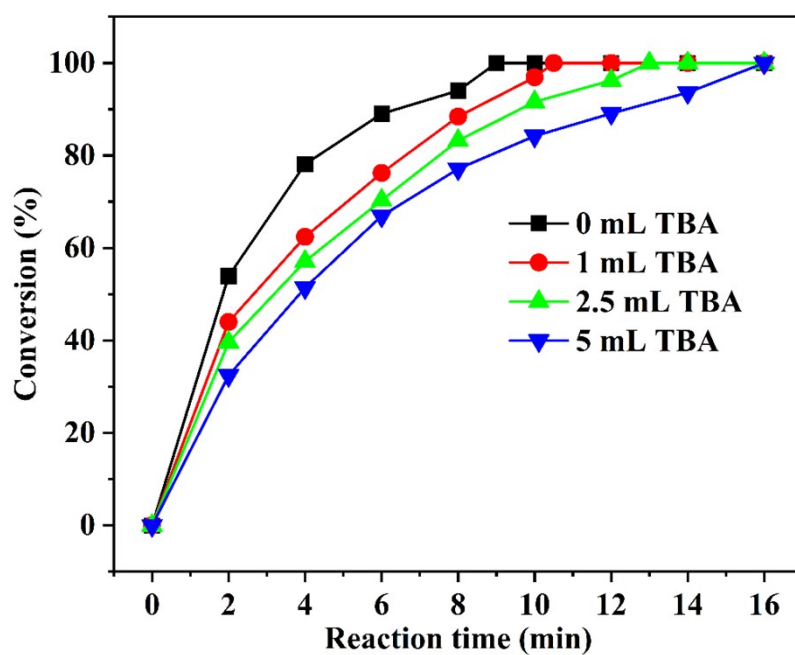

**Fig. S8** Effect of TBA on catalytic reduction efficiency of N,Se-CuO/NF(0.2-250-2).

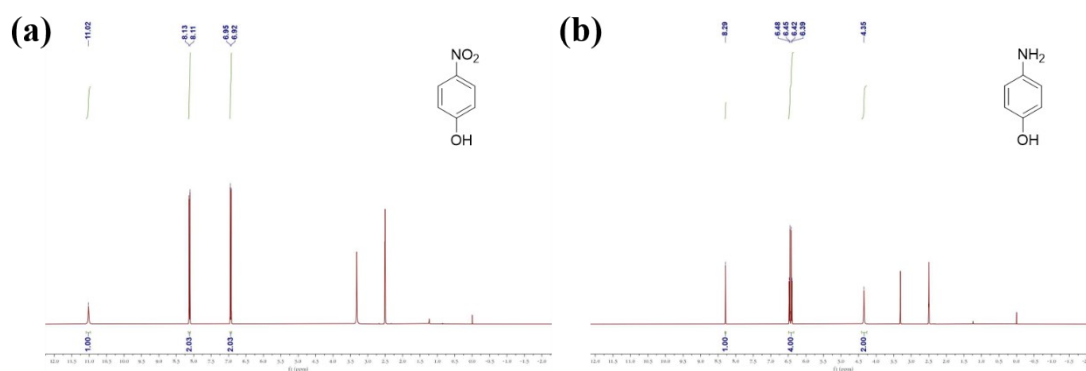

**Fig. S9** (a)  $^1\text{H}$  NMR spectrum of 4-nitrophenol,  $^1\text{H}$  NMR (400 MHz,  $\text{DMSO-}d_6$ )  $\delta$  11.02 (s, 1H), 8.12 (d,  $J = 9.2$  Hz, 2H), 6.94 (d,  $J = 9.2$  Hz, 2H). (b)  $^1\text{H}$  NMR spectrum of product,  $^1\text{H}$  NMR (400 MHz,  $\text{DMSO-}d_6$ )  $\delta$  8.29 (s, 1H), 6.49 – 6.35 (m, 4H), 4.35 (s, 2H).

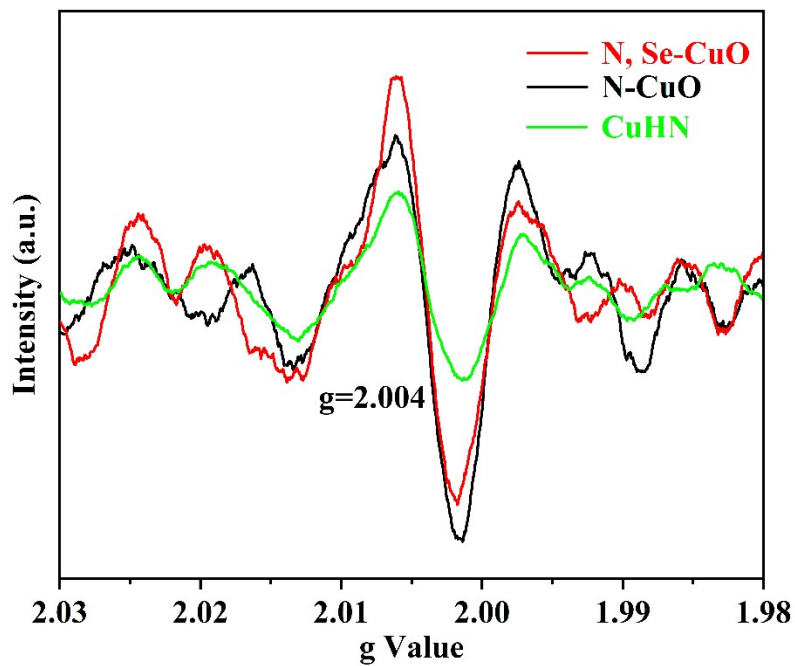

Fig. S10 EPR spectrum of CuHN, N-CuO and N,Se-CuO.

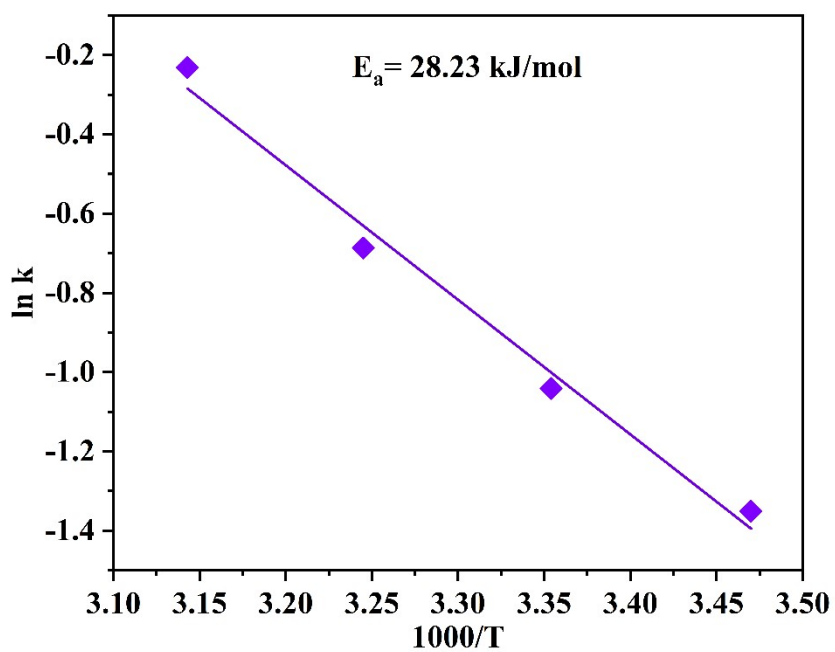

Fig. S11 The linear fitting curve of  $\ln(k)$  vs.  $1000/T$ .

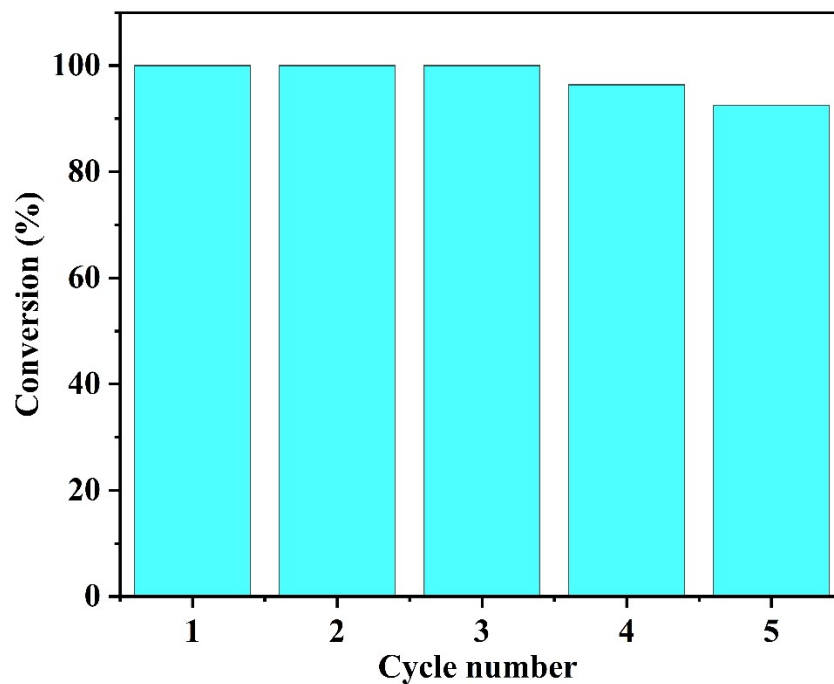

Fig. S12 Recycle testing of N,Se-CuO/NF(0.2-250-2) catalyst.

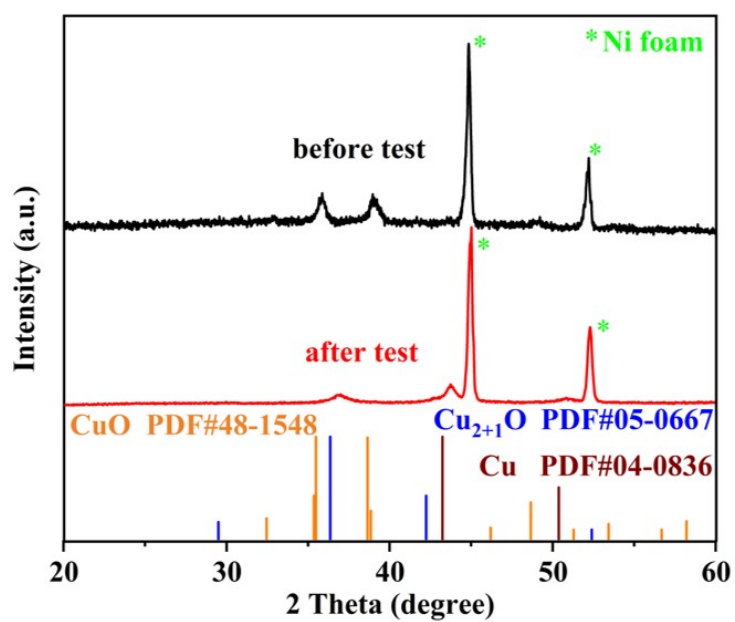

Fig. S13 XRD patterns of N,Se-CuO/NF(0.2-250-2) before and after five-cycle test.

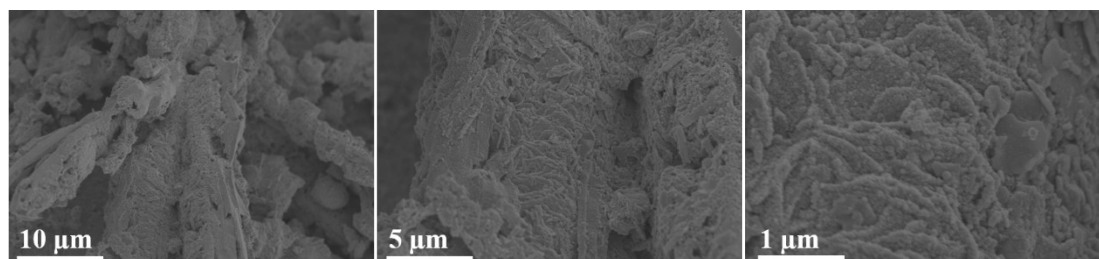

Fig. S14 SEM patterns of N,Se-CuO/NF(0.2-250-2) after five-cycle test.

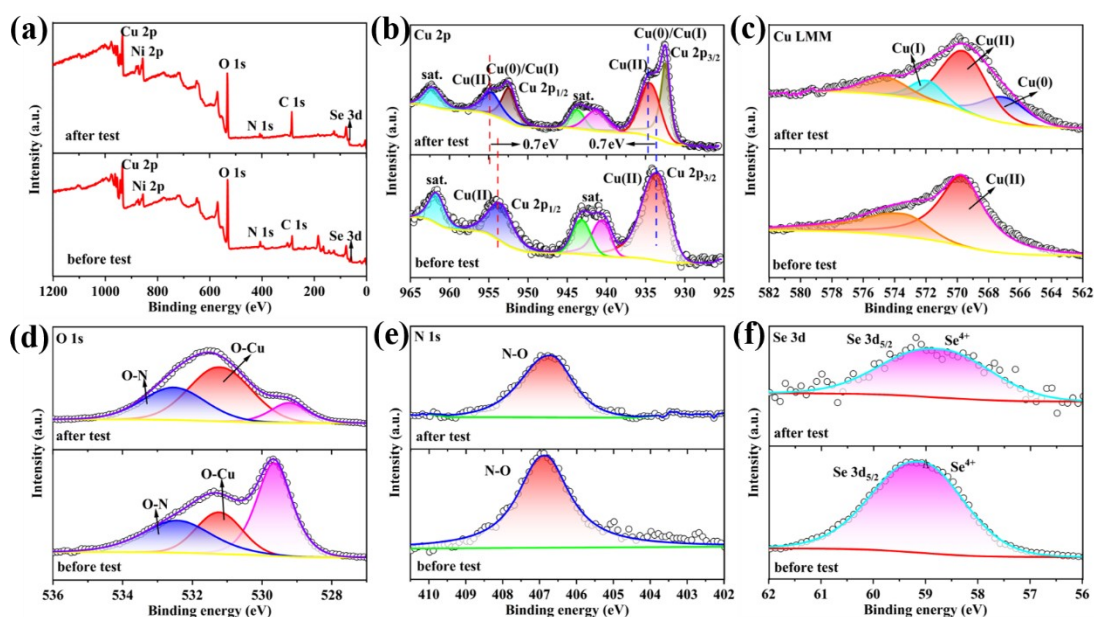

**Fig. S15** XPS patterns of N,Se-CuO/NF(0.2-250-2) before and after five-cycle test.

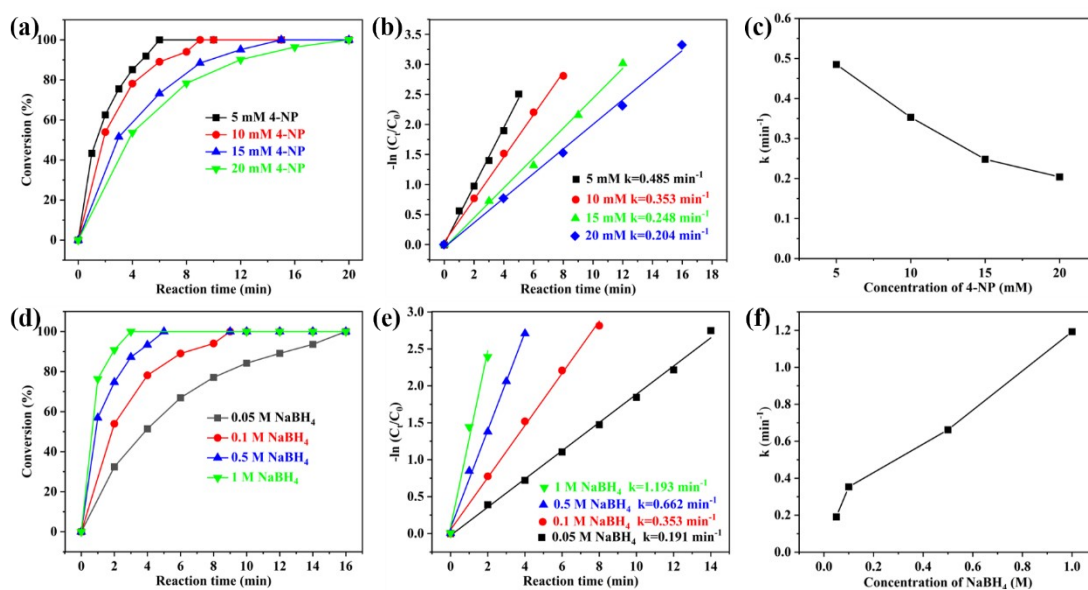

**Fig. S16** The effect of concentration of 4-NP on (a) 4-NP reduction efficiency and (b) plots of  $\ln(C_t/C_0)$  vs. the reaction time over N,Se-CuO/NF(0.2-250-2). The effect of concentration of  $\text{NaBH}_4$  on (d) 4-NP reduction efficiency and (e) plots of  $\ln(C_t/C_0)$  vs. the reaction time over N,Se-CuO/NF(0.2-250-2). The relationship of  $k$  with the concentration of (c) 4-NP and (f)  $\text{NaBH}_4$ .

**Table S1** Element content of N,Se-CuO/NF(0.2-250-2).

| Element | Atomic Fraction (%) | Mass Fraction (%) |
|---------|---------------------|-------------------|
| N       | 2.54                | 0.87              |
| O       | 45.32               | 17.79             |
| Cu      | 52.00               | 81.07             |
| Se      | 0.14                | 0.27              |

**Table S2** Comparison of catalytic performance of N, Se-CuO/NF (0.2-250-2) and other typical catalysts for 4-NP reduction.

| Catalyst                               | n(NaBH <sub>4</sub> ):<br>n(4-NP) | <i>k</i><br>(min <sup>-1</sup> ) | TOF<br>(mmol/(mg·min)) | <i>E<sub>a</sub></i><br>(kJ/mol) | Ref.      |
|----------------------------------------|-----------------------------------|----------------------------------|------------------------|----------------------------------|-----------|
| Hollow Porous Cu NPs                   | 400:1                             | \                                | 7.69×10 <sup>-4</sup>  | \                                | 1         |
| Cu/CuO/PET                             | 1000:1                            | 0.29                             | \                      | 39.9                             | 2         |
| Cu NCs                                 | 70000:17                          | \                                | \                      | 22.44                            | 3         |
| APBAs/CF-200                           | 2000:3                            | 2.057                            | 5×10 <sup>-5</sup>     | 19.2                             | 4         |
| Pd NSs                                 | 140:1                             | 0.14                             | 9.31×10 <sup>-2</sup>  | \                                | 5         |
| Cu microspheroids                      | 102:1                             | 0.239                            | 1.36×10 <sup>-5</sup>  | \                                | 6         |
| CDs/CuO/mHA                            | 60:1                              | 0.254                            | 8.33×10 <sup>-6</sup>  | \                                | 7         |
| Co@NC-MF                               | 100:1                             | 0.139                            | 1.44×10 <sup>-4</sup>  | 31.7                             | 8         |
| Fe <sub>3</sub> O <sub>4</sub> -Cu NCs | 40:1                              | \                                | 0.1                    | \                                | 9         |
| Cu <sub>2</sub> O/h-BN                 | 70:1                              | \                                | 5.99×10 <sup>-5</sup>  | \                                | 10        |
| CuO@C                                  | 45:2                              | 0.0151                           | 1.17×10 <sup>-4</sup>  | 31                               | 11        |
| GO-DAP-Ag NPs                          | 1000:1                            | \                                | 1.67×10 <sup>-5</sup>  | \                                | 12        |
| Ru/PC                                  | 781:1                             | 1.29                             | 3.55×10 <sup>-4</sup>  | 39.11                            | 13        |
| Ag/MR                                  | 50:1                              | \                                | 2.08×10 <sup>-2</sup>  | 31.17                            | 14        |
| Cu/Cu <sub>x</sub> O@CN                | 400:1                             | \                                | 3.12×10 <sup>-2</sup>  | 55.6                             | 15        |
| N, Se-CuO/NF                           | 10:1                              | 0.353                            | 0.247                  | 28.23                            | This work |

## Reference

1. J. Jiang, Y. Soo Lim, S. Park, S.-H. Kim, S. Yoon and L. Piao, *Nanoscale*, 2017, **9**, 3873-3880.
2. A. A. Mashentseva, M. Barsbay, M. V. Zdorovets, D. A. Zheltov and O. Güven, *Nanomaterials*, 2020, **10**, 1552-1572.
3. P. Zhang, Y. Sui, G. Xiao, Y. Wang, C. Wang, B. Liu, G. Zou and B. Zou, *J. Mater. Chem. A*, 2013, **1**, 1632-1638.
4. F. Chen, X. Yan, X. Hu, R. Feng, T. Li, X. Li and G. Zhao, *Journal of Environmental Management*, 2022, **314**, 115075-115082.
5. K. Gu, X. Pan, W. Wang, J. Ma, Y. Sun, H. Yang, H. Shen, Z. Huang and H. Liu, *Small*, 2018, **14**, 1801812-1801819.
6. S. Ghosh, R. Das, I. H. Chowdhury, P. Bhanja and M. K. Naskar, *RSC Advances*, 2015, **5**, 101519-101524.
7. Q. Chang, W. Xu, N. Li, C. Xue, Y. Wang, Y. Li, H. Wang, J. Yang and S. Hu, *Applied Catalysis B: Environmental*, 2020, **263**, 118299-118306.
8. J. Liu, J. Li, P. Jian and R. Jian, *Journal of Hazardous Materials*, 2021, **403**, 123987-123999.
9. W. Zhao, S. Yang, C. Guo, J. Yang and Y. Liu, *Materials Chemistry and Physics*, 2021, **260**, 124144-124148.
10. C. Huang, W. Ye, Q. Liu and X. Qiu, *ACS Applied Materials & Interfaces*, 2014,



- 6, 14469-14476.
11. A. A. Kassem, H. N. Abdelhamid, D. M. Fouad and S. A. Ibrahim, *Journal of Environmental Chemical Engineering*, 2021, **9**, 104401-104410.
  12. J. Nimita Jebaranjitham, C. Mageshwari, R. Saravanan and N. Mu, *Composites Part B: Engineering*, 2019, **171**, 302-309.
  13. R. Ding, Q. Chen, Q. Luo, L. Zhou, Y. Wang, Y. Zhang and G. Fan, *Green Chemistry*, 2020, **22**, 835-842.
  14. S. Jiang, L. Wang, Y. Duan, J. An, Q. Luo, Y. Zhang, Y. Tang, J. Huang, B. Zhang, J. Liu and D. Wang, *Applied Catalysis B: Environmental*, 2021, **283**, 119592-119599.
  15. W. Jia, F. Tian, M. Zhang, X. Li, S. Ye, Y. Ma, W. Wang, Y. Zhang, C. Meng, G. Zeng and J. Liu, *Journal of Colloid and Interface Science*, 2021, **594**, 254-264.
